# Supplementary material
Source: Research Square preprint supplement (doi:10.21203/rs.3.rs-9141435/v1)
Supplement: Supplementary file 1 [file 1cadbdd611e31b7a3d440b58.docx]

**Supplementary table 1. Prevalence of diagnosed long COVID among healthcare workers by hospital, sex, age group and occupational category**

|  |  | **Hospital del Mar (Barcelona)** | | | **Hospital Parc Taulí (Sabadell)** | | | **Hospital Ramón y Cajal (Madrid)** | | |
| --- | --- | --- | --- | --- | --- | --- | --- | --- | --- | --- |
| **Characteristic** | **Sex** | **COVID-19  N** | **Long COVID n** | **Prevalence  % (95% CI)** | **COVID-19  N** | **Long COVID n** | **Prevalence  % (95% CI)** | **COVID-19  N** | **Long COVID n** | **Prevalence  % (95% CI)** |
| **Total** | Women | 1,051 | 62 | 5.9 (4.6–7.5) | 2,642 | 77 | 2.9 (2.3–3.7) | 2,780 | 153 | 5.5 (4.7–6.4) |
| Men | 320 | 5 | 1.6 (0.7–3.6) | 685 | 23 | 3.4 (2.2–5.0) | 817 | 33 | 4.0 (2.9–5.6) |
| **Age group (years)** |  |  |  |  |  |  |  |  |  |  |
| <30 | Women | 340 | 9 | 2.6 (1.4–5.0) | 574 | 0 | 0.0 (0.0–0.7) | 608 | 12 | 2.0 (1.1–3.4) |
| Men | 108 | 0 | 0.0 (0.0–3.4) | 131 | 0 | 0.0 (0.0–2.9) | 235 | 9 | 3.8 (2.0–7.2) |
| 31–50 | Women | 470 | 27 | 5.7 (4.0–8.2) | 1,355 | 40 | 3.0 (2.2–4.0) | 1,348 | 83 | 6.2 (5.0–7.6) |
| Men | 143 | 3 | 2.1 (0.7–6.0) | 364 | 10 | 2.7 (1.5–4.9) | 382 | 9 | 2.4 (1.2–4.4) |
| >50 | Women | 241 | 26 | 10.8 (7.5–15.3) | 713 | 37 | 5.2 (3.8–7.1) | 805 | 58 | 7.2 (5.6–9.2) |
| Men | 69 | 2 | 2.9 (0.8–10.0) | 190 | 13 | 6.8 (4.0–11.4) | 251 | 15 | 6.0 (3.7–9.6) |
| **Occupational group** |  |  |  |  |  |  |  |  |  |  |
| Physician | Women | 182 | 1 | 0.5 (0.1–3.0) | 392 | 6 | 1.5 (0.7–3.3) | 558 | 27 | 4.8 (3.3–6.9) |
| Men | 91 | 0 | 0.0 (0.0–4.0) | 219 | 1 | 0.5 (0.1–2.5) | 371 | 13 | 3.5 (2.0–5.9) |
| Nurse | Women | 383 | 22 | 5.7 (3.8–8.5) | 754 | 19 | 2.5 (1.6–3.9) | 985 | 58 | 5.9 (4.6–7.5) |
| Men | 62 | 0 | 0.0 (0.0–5.8) | 123 | 4 | 3.3 (1.3–8.1) | 136 | 10 | 7.4 (4.0–13.1) |
| Nurse assistant | Women | 311 | 24 | 7.7 (5.2–11.3) | 687 | 35 | 5.1 (3.7–7.0) | 658 | 40 | 6.1 (4.5–8.2) |
| Men | 86 | 3 | 3.5 (1.2–9.8) | 155 | 10 | 6.5 (3.5–11.6) | 68 | 3 | 4.4 (1.5–12.1) |
| Other HCW | Women | 32 | 2 | 6.3 (1.7–20.2) | 335 | 6 | 1.8 (0.8–3.9) | 158 | 5 | 3.2 (1.4–7.1) |
| Men | 15 | 1 | 6.7 (1.2–29.8) | 60 | 1 | 1.7 (0.3–8.9) | 36 | 3 | 8.3 (2.9–21.8) |
| Administrative staff | Women | 83 | 8 | 9.6 (4.9–18.0) | 186 | 2 | 1.1 (0.3–3.8) | 235 | 15 | 6.4 (3.9–10.3) |
| Men | 26 | 0 | 0.0 (0.0–12.9) | 45 | 5 | 11.1 (4.9–23.4) | 50 | 2 | 4.0 (1.1–13.5) |
| Maintenance staff | Women | 44 | 5 | 11.4 (5.0–24.3) | 288 | 9 | 3.1 (1.6–5.9) | 186 | 8 | 4.3 (2.2–8.3) |
| Men | 33 | 1 | 3.0 (0.5–15.3) | 83 | 2 | 2.4 (0.7–8.3) | 213 | 2 | 0.9 (0.3–3.4) |
